1

2           **Two forms of phosphomannomutase in gammaproteobacteria:**  
3       **The overlooked membrane-bound form of AlgC is required for twitching**  
4           **motility of *Lysobacter enzymogenes***

5           Guoliang Qian<sup>1,2\*</sup>, Shifang Fei<sup>1,2</sup>, and Michael Y. Galperin<sup>3\*</sup>

6       <sup>1</sup> College of Plant Protection, Nanjing Agricultural University, Nanjing 210095, China

7       <sup>2</sup> Key Laboratory of Integrated Management of Crop Diseases and Pests, Nanjing  
8       Agricultural University, Ministry of Education, Nanjing 210014, China

9       <sup>3</sup> National Center for Biotechnology Information, National Library of Medicine, National  
10       Institutes of Health, Bethesda, Maryland 20894, USA

11       Correspondence to:

12       Guoliang Qian, tel: +86-25-8439-6109; Email: [glqian@njau.edu.cn](mailto:glqian@njau.edu.cn),

13       ORCID: 0000-0003-3577-3241 or

14       Michael Y. Galperin, tel. +1-301-435-5910; Email: [galperin@nih.gov](mailto:galperin@nih.gov),

15       ORCID: 0000-0002-2265-5572

16

17       **Running title:** Membrane-bound form of AlgC

18       **Keywords:** biofilm formation, twitching motility, periplasm, transcriptome,  
19       peptidoglycan, exopolysaccharide

20

21 **ABSTRACT**

22 *Lysobacter enzymogenes*, a member of *Xanthomonadaceae*, is a promising tool to control  
23 crop-destroying fungal pathogens. One of its key antifungal virulence factors is the type  
24 IV pili that are required for twitching motility. Transposon mutagenesis of *L. enzymogenes*  
25 revealed that production of type IV pili required the presence of the *Le2152* gene, which  
26 encodes an AlgC-type phosphomannomutase/phosphoglucomutase (PMM). However, in  
27 addition to the cytoplasmic PMM domain, the *Le2152* gene product contains a ca. 200-aa  
28 N-terminal periplasmic domain that is anchored in the membrane by two transmembrane  
29 segments and belongs to the dCache superfamily of periplasmic sensor domains.  
30 Sequence analysis identified similar membrane-anchored PMMs, encoded in conserved  
31 *coaBC-dut-algC* gene clusters, in a variety of gammaproteobacteria, either as the sole  
32 PMM gene in the entire genome or in addition to the gene encoding the stand-alone  
33 enzymatic domain. Previously overlooked N-terminal periplasmic sensor domains were  
34 detected in the well-characterized PMMs of *Pseudomonas aeruginosa* and *Xanthomonas*  
35 *campestris*, albeit not in the enzymes from *Pseudomonas fluorescens*, *Pseudomonas*  
36 *putida* or *Azotobacter vinelandii*. It appears that after the initial cloning of the  
37 enzymatically active soluble part of *P. aeruginosa* AlgC in 1991, all subsequent studies  
38 utilized N-terminally truncated open reading frames. The N-terminal dCache sensor  
39 domain of AlgC is predicted to modulate the PMM activity of the cytoplasmic domain in  
40 response to as yet unidentified environmental signal(s). AlgC-like membrane-bound  
41 PMMs appear to comprise yet another environmental signaling system that regulates  
42 production of type IV pili and potentially other systems in certain gammaproteobacteria.

## 43 INTRODUCTION

44 *Lysobacter enzymogenes*, a member of the gammaproteobacterial family  
45 *Xanthomonadaceae*, is a promising organism for biocontrol of fungal plant pathogens  
46 (Zhang and Yuen, 1999; Qian *et al.*, 2009). It infects filamentous fungal pathogens, such  
47 as *Bipolaris sorokiniana*, the causative agent of common root rot and spot blotch of barley  
48 and wheat seeds, and suppresses their growth through secretion of a heat-stable  
49 antifungal factor and production of extracellular chitinase, lysobactin, and other  
50 compounds (Zhang and Yuen, 2000; Yu *et al.*, 2007; Li *et al.*, 2008; de Bruijn *et al.*, 2015).  
51 Colonization by *L. enzymogenes* depends on formation of type IV pili (T4P) and T4P-  
52 mediated twitching motility (Patel *et al.*, 2010; 2011). Twitching motility mediated by T4P  
53 is considered an important taxonomical feature for the genus *Lysobacter* (Christensen  
54 and Cook, 1978).

55 Using *L. enzymogenes* strain OH11, originally isolated from the rhizosphere of green  
56 pepper (Qian *et al.*, 2009), as a working model, we have previously identified  
57 transcriptional regulators Clp and PilR as key regulators of T4P-mediated twitching  
58 motility (Wang *et al.*, 2014; Chen *et al.*, 2017; Chen *et al.*, 2018). Aiming to identify new  
59 regulators modulating twitching motility, we have conducted transposon mutagenesis of  
60 *L. enzymogenes* strain OH11 and analyzed the open reading frames (ORFs) whose  
61 disruption abolished twitching motility. Here we describe one of such ORFs, Le2152,  
62 which encodes a membrane-bound phosphomannomutase with an N-terminal  
63 periplasmic sensor domain, and analyze the distribution of such two-domain  
64 phosphomannomutases.

## 65 RESULTS

### 66 Le2152 protein is required for type IV pili-mediated twitching motility

67 We have used a wild-type environmental isolate of *L. enzymogenes*, strain OH11 (Qian  
68 *et al.*, 2009), to conduct transposon mutagenesis with Tn5 and generate a mutant library.  
69 After screening more than 300 mutant strains, we identified a mutant that completely

70 lacked twitching motility. The disrupted gene in this mutant was identified as *Le2152*  
71 (locus tag D9T17\_01580, GenBank accession number ROU09072.2), which encodes a 772-  
72 aa protein that was predicted to function as a phosphomannomutase. To validate the  
73 role of *Le2125* in twitching motility, we generated an in-frame deletion mutant via  
74 homologous double cross-over recombination, as described previously (Qian *et al.*, 2012),  
75 see Supporting Information Tables S1 and S2 for experimental details. As shown in Figure  
76 1, this in-frame deletion mutant,  $\Delta Le2152$ , was also deficient in twitching motility, as no  
77 mobile cells were observed at the margin of its colony, whereas wild-type OH11 had  
78 numerous mobile cells at the margin of its colonies. Introduction of a plasmid-borne  
79 *Le2152* gene under its native promoter fully restored twitching motility of  $\Delta Le2152$ , while  
80 the  $\Delta Le2152$  strain carrying an empty vector was still deficient in this function. In contrast  
81 to the  $\Delta Le2152$  strain, a mutant with a deletion in *Le4861* gene that codes for a closely  
82 related enzyme phosphoglucosamine mutase (GlmM, locus tag D9T17\_13225, GenBank  
83 accession ROU06416.1) exhibited no motility defect (Supporting Information Figure S1).  
84 These results show that the product of *Le2152* is required for twitching motility in  
85 *L. enzymogenes*.

## 86 Domain architecture and phylogenetic distribution of *Le2152* homologs

87 Sequence analysis of the *Le2152* gene product revealed that it contains a typical 450-  
88 aa cytoplasmic phosphomannomutase (PMM) domain. However, this domain is preceded  
89 by a 320-aa N-terminal fragment that consists of 200-aa predicted periplasmic domain,  
90 which is anchored in the membrane by two transmembrane segments and followed by a  
91 55-aa Pro-rich flexible linker (Figure 2).

92 To check if the full-length *Le2152* protein – or just its cytoplasmic enzymatic domain  
93 – is expressed *in vivo*, we expressed in *L. enzymogenes* the *Le2152* protein fused with a  
94 C-terminal FLAG tag from the pBBR1-MCS5 plasmid under its native promoter and  
95 performed a Western blot, probing it with anti-FLAG antibodies. The expressed *Le2152*  
96 protein showed molecular weight of ca. 100 KDa, which is above the calculated molecular

97 weight of 82 kDa of the full-length Le2152 (Supporting Information [Figure S2A](#)). The  
98 reason for this discrepancy is still unclear, but this observation shows that the full-length  
99 Le2152 is indeed expressed *in vivo* and is the form that is essential for the *L. enzymogenes*  
100 twitching motility.

101 Sensitive sequence similarity searches with HHPred (Zimmermann *et al.*, 2018)  
102 allowed assigning the N-terminal periplasmic domain of Le2152 to the Double Cache  
103 (dCache) domain superfamily (Upadhyay *et al.*, 2016), previously referred to as PDC  
104 (PhoQ, DcuS and CitA) fold domains (Cheung *et al.*, 2008; Zhang and Hendrickson, 2010;  
105 Pineda-Molina *et al.*, 2012). Within the dCache superfamily, the periplasmic domain of  
106 Le2152 showed the highest similarity to the Pfam domain *dCache\_3* (PF14827, (El-Gebali  
107 *et al.*, 2019)). Among domains of known 3D structure, it was most similar to the *dCache\_1*  
108 (PF02743) sensor domain of the *Bacillus subtilis* sporulation kinase KinD (Protein  
109 DataBank entry 4JGP) and C4-dicarboxylate-binding sensor domains of the histidine  
110 kinase DctB from *Vibrio cholerae* and *Sinorhizobium meliloti* (PDB: 3BY9 and 3E4P)  
111 (Cheung and Hendrickson, 2008; Zhou *et al.*, 2008), which are described in Pfam as the  
112 *Cache\_3-Cache\_2* fusion domain (PF17201). Thus, the periplasmic domain of Le2152 falls  
113 somewhere in-between *dCache\_1*, *dCache\_3*, and *Cache\_3-Cache\_2* domains and likely  
114 represents a new family of dCache domains, which could be a reason why it has escaped  
115 recognition for so long. The sequence logo and a representative alignment of the dCache  
116 domain of Le2152 are shown in Supporting Information [Figures S2](#). This figure also shows  
117 a sequence logo of the flexible linker domain and an alignment of the cytoplasmic  
118 enzymatic domain of Le2152.

119 Sequence similarity searches using Le2152 protein as the query revealed the presence  
120 of similar two-domain membrane-anchored PMMs in a variety of gammaproteobacteria.  
121 Out of the currently recognized 20 orders of gammaproteobacteria, such proteins were  
122 found to be encoded in representatives of at least eight: *Alteromonadales*, *Cellvibrionales*,  
123 *Chromatiales*, *Methylococcales*, *Oceanospirillales*, *Pseudomonadales*, *Thiotrichales*, and  
124 *Xanthomonadales* ([Table 1](#)). Many of these bacteria, including the well-studied model

125 organisms *Alcanivorax borkumensis*, *Stenotrophomonas maltophilia* and *Xanthomonas*  
126 *citri*, carry two PMM genes: one (the “long” version) that codes for the two-domain  
127 membrane-anchored PMM and the other (the “short” version) that codes for the stand-  
128 alone enzymatic domain. In other organisms, such as *Lysobacter spp.*, the membrane-  
129 anchored PMM is the only one encoded in the genome, although all these organisms also  
130 carry the *glmM* genes that code for the closely related soluble phosphoglucosamine  
131 mutase (Supporting Information [Table S3](#)), which has been reported to have certain PMM  
132 activity (Tavares *et al.*, 2000).

133 The “short” PMM genes have variable genomic neighborhoods that often include the  
134 *xanB* (or *cpsB*) gene that codes for the bifunctional mannose-1-phosphate guanylyltrans-  
135 ferase/phosphomannose isomerase. By contrast, the “long” PMM genes reside in  
136 conserved gene clusters that include the *coaBC* gene(s) encoding bifunctional  
137 phosphopantothencysteine decarboxylase and phosphopantothenate–cysteine ligase;  
138 the *dut* gene, which encodes the house-cleaning dUTPase, and, in many organisms, the  
139 N-acetylglutamate kinase gene *argB* ([Figure 3](#), see also Supporting Information [Figure S3](#)).

140 All long PMMs, retrieved by iterative sequence similarity searches with PSI-BLAST and  
141 jackHMMer, were predicted to have essentially the same domain architecture as Le2152  
142 ([Figure 2](#)), which included a dCache-type periplasmic sensor domain anchored by two  
143 transmembrane helices and followed by a flexible linker and the cytoplasmically located  
144 enzymatic domain. These (predicted) periplasmic domains displayed only a limited  
145 sequence similarity with few conserved residues (Supporting Information [Figure S2B](#)),  
146 consistent with a ligand-binding, rather than enzymatic, function.

147 Remarkably, in the original genome annotations of *Xylella fastidiosa*, *Xanthomonas*  
148 *campestris*, and *X. citri*, translations of the membrane-bound PMMs were artificially  
149 truncated by removing the N-terminal fragments and leaving each of these organisms  
150 with two ORFs encoding only the XanA/ManB-like enzymatic domain ([Table 1](#)). In  
151 subsequent annotations, some of the full-length ORFs have been restored but N-

152 terminally truncated PMMs are still listed in certain GenBank and UniProt entries  
153 (Supporting Information [Table S3](#) and [Figure S3](#)).

154 Just like *Lysobacter* spp., all checked members of the *Pseudomonas* genus carried only  
155 a single PMM gene. However, while some *Pseudomonas* spp. encoded the membrane-  
156 anchored two-domain version of the enzyme, others encoded only the XanA-like  
157 cytoplasmic version ([Table 1](#), [Figure 3](#)). Surprisingly, the N-terminal periplasmic dCache  
158 domain was also detected in the ORFs of the well-characterized phosphomannomutase  
159 AlgC of *P. aeruginosa* strains PAO1 and PA14 ([Table 1](#)). While the enzymatically active C-  
160 terminal part of this protein had been cloned back in 1991 (Zielinski *et al.*, 1991), the full-  
161 length 868-aa ORF was only translated from the complete genome sequence. Still, the  
162 shorter 463-aa ORF was routinely assumed to be the correct one. With almost 2,000  
163 genome sequences of various strains of *P. aeruginosa* available in the public databases as  
164 of 01.01.2019, GenBank contained 1,785 sequences of the two-domain AlgC (ranging in  
165 length from 863 to 870 aa) and 26 sequences of the enzymatically active shorter version  
166 of this protein (from 463 to 470 aa). In *Pseudomonas syringae*, about half of the  
167 annotated PMM sequences from various strains were of the “short” variety (usually 465  
168 aa long) but these genes were always preceded by an untranslated region of ~1.2 kb. By  
169 contrast, all PMM genes from *Pseudomonas fluorescens*, *Pseudomonas protegens*, and  
170 *Pseudomonas putida* were of the “short” variety and had no significant gaps in front of  
171 them ([Figure 3](#), see also Supporting Information [Figure S3](#)). However, these short PMM  
172 genes of *Pseudomonas* spp. were still located in the same conserved *coaBC-dut-algC-argB*  
173 gene clusters as the long genes. Further, while most C-terminal enzymatic domains of  
174 long and short PMMs clustered separately from each other, forming two well-resolved  
175 clades, products of short PMM genes of *P. fluorescens*, *P. protegens* and *P. putida*  
176 clustered with the long PMMs from other pseudomonads, rather than with short PMMs  
177 from other organisms (Supporting Information [Figure S4](#)). These observations suggest  
178 that (i) the short PMMs of *Pseudomonas* spp. evolved through the loss of their N-terminal  
179 fragments and (ii) this loss was a relatively recent event.

## 180 Expression of the two-domain phosphomannomutase

181 Given that only the C-terminal parts of long PMMs have the enzymatic activity, the  
182 question arises if the full-size ORFs are getting expressed. As mentioned above, the full-  
183 length Le2152 protein expressed from its native promoter exhibited molecular weight of  
184 ca. 100 kDa (Supporting Information [Figure S2A](#)). In addition, examination of the publicly  
185 available transcriptomic data for several “long” PMM-encoding bacteria, available in the  
186 NCBI’s Sequence Read Archive (SRA), revealed expression of the RNAs corresponding to  
187 the N-terminal dCache domains of their PMMs (Supporting Information [Figure S5](#)). In  
188 addition to *L. enzymogenes*, transcribed RNAs from the 5’ regions of the respective ORFs  
189 have been found in the SRA entries for various *Xanthomonas* spp., including *X. campestris*  
190 strains 8004 and B100 (Bonomi *et al.*, 2016; Wang *et al.*, 2017; Alkhateeb *et al.*, 2018),  
191 *X. citri* (Jalan *et al.*, 2013), and *X. oryzae* (Kim *et al.*, 2016), as well as *S. maltophilia* strains  
192 K279a and FLR (Abda *et al.*, 2015; Gallagher *et al.*, 2019) and *Xylella fastidiosa* strain  
193 ‘Temecula’ (Parker *et al.*, 2016), see Supporting Information [Table S4](#). A similar picture,  
194 showing expression of the full-length AlgC-type PMM, was observed in *P. aeruginosa*  
195 strains PAO1 and PA14 (Supporting Information [Figure S5](#)), although in the former several  
196 SRA profiles showed expression of only the cytoplasmic fragment. Expression of “long”  
197 PMM genes was also detected in other *Pseudomonas* spp., as well as in representatives  
198 of other gammaproteobacterial orders, such as *Cellvibrio japonicus* (Blake *et al.*, 2018)  
199 and *Methylobacter tundripaludum* (Krause *et al.*, 2017). Finally, unpublished RNA-Seq  
200 data from the DOE Joint Genome Institute revealed robust expression of the full-length  
201 PMM gene of *Methylococcus capsulatus*, which is currently listed in GenBank in truncated  
202 form (Supporting Information [Table S4](#)). These data clearly show the presence of  
203 transcripts for the N-terminal dCache domain of “long” PMMs in a variety of  
204 gammaproteobacteria. At the same time, these RNA-Seq profiles often showed an even  
205 larger number of transcripts for the C-terminal enzymatic parts of these PMMs. Taken  
206 together, these data indicate that the full-size PMM genes are actively transcribed and  
207 are subject to a complex regulation with the possibility of additional transcription starts.



## 208 DISCUSSION

209 A widespread group of experimentally characterized bacterial genes, referred to as  
210 *algC* in *P. aeruginosa*, *exoC* in *Azospirillum brasilense*, *manB* (*cpsG*) and *rfbK* in *Escherichia*  
211 *coli* and *Salmonella*, *noeK* in *Sinorhizobium fredii*, *pgmG* in *Sphingomonas sanxanigenens*,  
212 *pmmA* in *Prochlorothrix hollandica*, *rfbB* in *Vibrio cholerae*, *spgM* in *S. maltophilia* and  
213 *xanA* in *X. citri*, encode the same enzyme, phosphomannomutase/phosphoglucosaminomutase  
214 (Stevenson *et al.*, 1991; Zielinski *et al.*, 1991; Köplin *et al.*, 1992; McKay *et al.*, 2003).  
215 Phosphomannomutase (PMM, EC 5.4.2.8) catalyzes reversible interconversion of  $\alpha$ -D-  
216 mannose 6-phosphate and  $\alpha$ -D-mannose 1-phosphate, a key reaction in the biosynthesis  
217 of the colanic acid, alginate, and xanthan gum (Zielinski *et al.*, 1991; Köplin *et al.*, 1992).  
218 This enzyme also functions as phosphoglucosaminomutase (PGM, EC 5.4.2.2), catalyzing  
219 interconversion of  $\alpha$ -D-glucose 6-phosphate and  $\alpha$ -D-glucose 1-phosphate that is involved  
220 in synthesis of the bacterial lipopolysaccharide. In *P. aeruginosa*, it is also involved in  
221 production of rhamnolipid surfactants (Olvera *et al.*, 1999). The same  $\alpha$ -D-  
222 phosphohexomutase superfamily also includes phosphoglucosamine mutase (GlmM, EC  
223 5.4.2.10) that catalyzes the conversion of  $\alpha$ -glucosamine-6-phosphate to  $\alpha$ -glucosamine-  
224 1-phosphate, which is involved in peptidoglycan and lipopolysaccharide biosynthesis  
225 (Mehra-Chaudhary *et al.*, 2011a). Bacterial GlmMs reportedly have a PMM activity of  
226 about 20% of its phosphoglucosamine mutase activity and a low PGM activity (Tavares *et al.*,  
227 2000). The biochemical and structural properties of these enzymes have been  
228 extensively characterized, with high-resolution crystal structures available for  
229 *P. aeruginosa* AlgC (Regni *et al.*, 2002; Regni *et al.*, 2004), *X. citri* XanA (Goto *et al.*, 2016),  
230 human PGM1 (Stiers and Beamer, 2018) and PMMs from several other organisms, as well  
231 as for *Bacillus anthracis* GlmM (Mehra-Chaudhary *et al.*, 2011a). The phylogenetic  
232 relationships between these enzymes and the structural basis of the enzyme specificity  
233 have been described in detail (Whitehouse *et al.*, 1998; Regni *et al.*, 2004; Shackelford *et al.*,  
234 2004), see (Stiers *et al.*, 2017) for a comprehensive review. It should be noted that  
235 certain eukaryotes, bacteria and archaea encode a distinct form of PMM/PGM, a member  
236 of the haloacid dehalogenase (HAD) superfamily (Zhang *et al.*, 2018), that has a distinct

237 structural fold and therefore represents an analogous (non-homologous isofunctional)  
238 enzyme (Omelchenko *et al.*, 2010).

239 While eukaryotic PMM/PGMs have been extensively studied since 1950s, the first  
240 bacterial enzymes of this family have been cloned and characterized in 1991 (Jiang *et al.*,  
241 1991; Stevenson *et al.*, 1991; Zielinski *et al.*, 1991). The cloned 463-aa ORF from  
242 *P. aeruginosa*, which restored mucoid phenotype to an alginate-negative mutant,  
243 represented the enzymatically active C-terminal part of the protein, starting from the  
244 Met392 of the “long” ORF (Table 1 and Supporting Information Figure S3). All subsequent  
245 studies assumed this fragment to be the full-length protein, and its upstream DNA region  
246 (GenBank accession L00980), sequenced shortly thereafter (Zielinski *et al.*, 1992), has not  
247 been recognized as protein-coding. Further, in the process of curation at UniProtKB, the  
248 full-length AlgC sequence of *P. aeruginosa* strain PA14 (locus tag PA14\_70270, GenBank  
249 accession ABJ14705.1) has been marked as ‘erroneous initiation’, and the N-terminal  
250 periplasmic domain was removed from the ALGC\_PSEAB entry (Table 1). The data  
251 presented in Supporting Information Figure S5 clearly show that the full-length ORF  
252 PA14\_70270 of *P. aeruginosa* strain PA14 is in fact transcribed and there is no reason to  
253 assume that it could not be translated, as has been shown here for the *L. enzymogenes*  
254 protein Le2152 (Supporting Information Figure S2A).

255 The combination of a periplasmic dCache-type sensor domain with a cytoplasmic  
256 enzymatic domain suggests that the activity of the membrane-anchored PMMs could be  
257 modulated by external ligands, such as C4-dicarboxylates or acetate that are sensed by  
258 some dCache domains (Cheung and Hendrickson, 2008; Zhou *et al.*, 2008; Pineda-Molina  
259 *et al.*, 2012); the ligand sensed by the closely related *dCache\_1* domain of *B. subtilis*  
260 sporulation kinase KinD remains to be identified. If so, two-domain PMMs would offer  
261 yet another example of a sensory system that regulates bacterial metabolism in response  
262 to environmental cues (Galperin, 2004, 2018). Environmental regulation of the  
263 PMM/PGM activity would seem justified, based on the unique position of this enzyme as  
264 a common step in peptidoglycan, lipopolysaccharide, and exopolysaccharide biosynthesis

265 pathways. In *P. aeruginosa*, AlgC has been even referred to as a checkpoint enzyme that  
266 coordinates biosynthesis of alginate, Pel, Psl and lipopolysaccharide (Ma *et al.*, 2012).  
267 However, regulation by dCache domains is typically mediated by their dimerization, which  
268 in turn leads to dimerization and, hence, activation of the downstream enzymatic or  
269 methyl-acceptor domains (Ortega *et al.*, 2017). All available data indicate that PMMs are  
270 active as monomers, although some PGMs and GlmMs have been seen to form dimers  
271 (Mehra-Chaudhary *et al.*, 2011a; Mehra-Chaudhary *et al.*, 2011b; Stiers *et al.*, 2017).  
272 Future experiments will be needed to figure out the mechanisms of regulation of AlgC-  
273 type PMMs. It is quite likely that the periplasmic dCache domains inhibit, rather than  
274 activate, the PMM activity of the respective cytoplasmic domains. It is important to note  
275 that most data obtained by studying (short) AlgC enzymes would not be affected by the  
276 sequence correction suggested in this work. Deletion of the cytoplasmic domain of a long  
277 PMM abolishes its enzymatic activity, so all mutation data remain valid. Further, the RNA-  
278 Seq data examined in the course of this work (Supporting Information [Figure S5](#)) suggest  
279 the existence of at least two transcription starts, so there is a distinct possibility that a  
280 “short” ORF could be expressed *in vivo* from the “long” AlgC template. Therefore, *algC*  
281 expression and its PMM/PGM activity are likely to be regulated at both the transcriptional  
282 and post-transcriptional level. *Lysobacter enzymogenes*, where AlgC is directly involved  
283 in production of type IV pili, could serve as an attractive model to untangle the complex  
284 regulation of the PMM/PGM activity and its role in various cellular processes.

285 On a more general note, this Genome Update shows the value of examining the  
286 genomic data even for very well characterized enzymes.

## 287 **EXPERIMENTAL PROCEDURES**

### 288 ***Bacterial strains, plasmids and growth conditions***

289 The bacterial strains and plasmids used in this study are listed in Supporting Information  
290 [Table S1](#). Unless stated otherwise, *L. enzymogenes* was grown in LB medium or 1/10

291 Tryptic Soy Broth (TSB) at 28 °C with appropriate antibiotics -- kanamycin (Km), 25 µg/mL,  
292 for mutant construction and gentamicin (Gm), 150 µg/mL, for plasmid maintenance.

### 293 **Genetic methods**

294 Double-crossover homologous recombination was used to generate mutants in  
295 *L. enzymogenes* OH11, as described previously (Qian *et al.*, 2012), using primers listed in  
296 Supporting Information [Table S2](#). In brief, two flanking regions of *Le2152* were generated  
297 by PCR amplification and cloned into the suicide vector pEX18Gm (Supporting Information  
298 [Table S1](#)). The final constructs were transformed into the wild-type strain by  
299 electroporation. The single-crossover recombinants were selected on LB plates  
300 supplemented with Km and Gm. The recombinants were cultured in LB without  
301 antibiotics for 6 h and subsequently plated on LB agar containing 10% (w/v) sucrose and  
302 Km. The sucrose-resistant, Km-resistant but Gm-sensitive colonies representing double  
303 crossovers were picked up. In-frame gene deletions were verified by PCR using  
304 appropriate primers (Supporting Information [Table S2](#)).

305 Gene complementation construct was generated as described earlier (Qian *et al.*,  
306 2014). Briefly, the DNA fragment containing the coding region of *Le2152* and its native  
307 promoter region was amplified by PCR with designated primer pairs (Supporting  
308 Information [Table S2](#)) and cloned into the broad-host vector pBBR1-MCS5 (Supporting  
309 Information [Table S1](#)). The plasmid was transformed into the mutant by electroporation,  
310 and the transformants were selected on the LB plates containing Km and Gm.

### 311 **Twitching motility assay**

312 Twitching motility of *L. enzymogenes* OH11 was assayed as described previously (Wang  
313 *et al.*, 2014). In general, a thin layer of 1 mL 1/20 tryptic soy agar medium supplemented  
314 with 1.8% agar was evenly spread onto a sterilized microscope slide. To create a thin  
315 inoculation line, the edge of a sterilized coverslip was dipped into the bacterial cell  
316 suspension and then gently pressed onto the surface of the medium. After 24 h  
317 incubation, the margin of the bacterial culture on the microscope slide was observed

318 under a microscope at 640X magnification. Twitching motility of *L. enzymogenes* was  
319 indicated by the presence of individual mobile cells or small clusters of cells growing  
320 outwardly from the main colony, as described in our earlier report (Wang *et al.*, 2014).  
321 Three replicate slides were used for each sample, with the experiment carried out three  
322 times.

### 323 **Sequence analysis**

324 Iterative sequence similarity searches were performed using PSI-BLAST (Altschul *et al.*,  
325 1997) and jackHMMer (Potter *et al.*, 2018). The transmembrane orientation and  
326 domain architectures of long PMMs were predicted using TMHMM (Krogh *et al.*, 2001)  
327 and verified by checking the InterPro (Mitchell *et al.*, 2019) entries, where available.  
328 Genomic neighborhoods of “long” and “short” PMM genes were examined using the SEED  
329 (Overbeek *et al.*, 2014) and the NCBI Genome database and plotted using the respective  
330 genomic coordinates. Alignments of the predicted periplasmic domains and the flexible  
331 linkers were generated from jackHMMer outputs and used to create the sequence logos  
332 with WebLogo (Crooks *et al.*, 2004). Phylogenetic analysis of the enzymatic domains of  
333 short and long PMMs was performed with MEGA7 (Kumar *et al.*, 2016) using an alignment  
334 generated by MUSCLE (Edgar, 2004) and manually trimmed to remove non-enzymatic  
335 domains.

336 Analysis of the RNA-Seq data was performed by searching the NCBI’s Sequence Read  
337 Archive (SRA) with MegaBLAST (Zhang *et al.*, 2000). Genomic fragments coding for the  
338 long PMM genes from [Table 1](#) were expanded to 3 kb in such a way that each of them  
339 included the *algC* upstream region and a part of the *dut* ORF. These 3-kb DNA fragments  
340 were used to query the SRA entries for the respective organisms using discontinuous  
341 MegaBLAST with default parameters, except that ‘Max target sequences’ number was  
342 increased to 1000. The results from each MegaBLAST search were examined by setting  
343 the ‘Graphical overview’ parameter to 1000 sequences and checking for hits that  
344 correspond to the N-terminal fragments of the “long” PMMs.

345

## 346 **ACKNOWLEDGEMENTS**

347 This work was supported by the National Natural Science Foundation of China  
348 (31872016 to GQ), the Fundamental Research Funds for the Central Universities  
349 (KYT201805, Y0201600126 and KYTZ201403 to GQ), Natural Science Foundation of  
350 Jiangsu Province (BK20181325 to GQ), Innovation Team Program for Jiangsu Universities  
351 (2017 to GQ) and by the NIH Intramural Research Program at the National Library of  
352 Medicine (MYG).

353

## 354 **REFERENCES**

- 355 Abda, E.M., Krysciak, D., Krohn-Molt, I., Mamat, U., Schmeisser, C., Forstner, K.U., *et al.*  
356 (2015) Phenotypic heterogeneity affects *Stenotrophomonas maltophilia* K279a  
357 colony morphotypes and beta-lactamase expression. *Front Microbiol* **6**: 1373.
- 358 Alkhateeb, R.S., Vorhölter, F.J., Steffens, T., Rückert, C., Ortseifen, V., Hublik, G., *et al.*  
359 (2018) Comparative transcription profiling of two fermentation cultures of  
360 *Xanthomonas campestris* pv. *campestris* B100 sampled in the growth and in the  
361 stationary phase. *Appl Microbiol Biotechnol* **102**: 6613-6625.
- 362 Altschul, S.F., Madden, T.L., Schaffer, A.A., Zhang, J., Zhang, Z., Miller, W., and Lipman,  
363 D.J. (1997) Gapped BLAST and PSI-BLAST: a new generation of protein database  
364 search programs. *Nucleic Acids Res* **25**: 3389-3402.
- 365 Blake, A.D., Beri, N.R., Guttman, H.S., Cheng, R., and Gardner, J.G. (2018) The complex  
366 physiology of *Cellvibrio japonicus* xylan degradation relies on a single cytoplasmic  $\beta$ -  
367 xylosidase for xylo-oligosaccharide utilization. *Mol Microbiol* **107**: 610-622.
- 368 Bonomi, H.R., Toum, L., Sycz, G., Sieira, R., Toscani, A.M., Gudesblat, G.E., *et al.* (2016)  
369 *Xanthomonas campestris* attenuates virulence by sensing light through a  
370 bacteriophytochrome photoreceptor. *EMBO Rep* **17**: 1565-1577.
- 371 Chen, J., Shen, D., Odhiambo, B.O., Xu, D., Han, S., Chou, S.H., and Qian, G. (2018) Two  
372 direct gene targets contribute to Clp-dependent regulation of type IV pilus-mediated  
373 twitching motility in *Lysobacter enzymogenes* OH11. *Appl Microbiol Biotechnol* **102**:  
374 7509-7519.
- 375 Chen, Y., Xia, J., Su, Z., Xu, G., Gomelsky, M., Qian, G., and Liu, F. (2017) *Lysobacter* PilR,  
376 the regulator of type IV pilus synthesis, controls antifungal antibiotic production via a  
377 cyclic di-GMP pathway. *Appl Environ Microbiol* **83**: e03397-16.
- 378 Cheung, J., and Hendrickson, W.A. (2008) Crystal structures of C4-dicarboxylate ligand  
379 complexes with sensor domains of histidine kinases DcuS and DctB. *J Biol Chem* **283**:  
380 30256-30265.

- 381 Cheung, J., Bingman, C.A., Reyngold, M., Hendrickson, W.A., and Waldburger, C.D. (2008)  
382 Crystal structure of a functional dimer of the PhoQ sensor domain. *J Biol Chem* **283**:  
383 13762-13770.
- 384 Christensen, P., and Cook, F.D. (1978) *Lysobacter*, a new genus of nonfruiting, gliding  
385 bacteria with a high base ratio. *Int J Syst Bacteriol* **28**: 367-393.
- 386 Crooks, G.E., Hon, G., Chandonia, J.M., and Brenner, S.E. (2004) WebLogo: a sequence  
387 logo generator. *Genome Res* **14**: 1188-1190.
- 388 de Bruijn, I., Cheng, X., de Jager, V., Exposito, R.G., Watrous, J., Patel, N., *et al.* (2015)  
389 Comparative genomics and metabolic profiling of the genus *Lysobacter*. *BMC*  
390 *Genomics* **16**: 991.
- 391 Edgar, R.C. (2004) MUSCLE: multiple sequence alignment with high accuracy and high  
392 throughput. *Nucleic Acids Res* **32**: 1792-1797.
- 393 El-Gebali, S., Mistry, J., Bateman, A., Eddy, S.R., Luciani, A., Potter, S.C., *et al.* (2019) The  
394 Pfam protein families database in 2019. *Nucleic Acids Res* **47**: D427-D432.
- 395 Gallagher, T., Phan, J., Oliver, A., Chase, A.B., England, W.E., Wandro, S., *et al.* (2019)  
396 Cystic fibrosis-associated *Stenotrophomonas maltophilia* strain-specific adaptations  
397 and responses to pH. *J Bacteriol* **201**: e00478-00418.
- 398 Galperin, M.Y. (2004) Bacterial signal transduction network in a genomic perspective.  
399 *Environ Microbiol* **6**: 552-567.
- 400 Galperin, M.Y. (2018) What bacteria want. *Environ Microbiol* **20**: 4221-4229.
- 401 Galperin, M.Y., Makarova, K.S., Wolf, Y.I., and Koonin, E.V. (2015) Expanded microbial  
402 genome coverage and improved protein family annotation in the COG database.  
403 *Nucleic Acids Res* **43**: D261-269.
- 404 Goto, L.S., Alexandrino, A.V., Malvessi Pereira, C., Silva Martins, C., Pereira, H.D.,  
405 Brandao-Neto, J., and Novo-Mansur, M.T.M. (2016) Structural and functional  
406 characterization of the phosphoglucosyltransferase from *Xanthomonas citri* subsp. *citri*.  
407 *Biochim Biophys Acta* **1864**: 1658-1666.
- 408 Jalan, N., Kumar, D., Andrade, M.O., Yu, F., Jones, J.B., Graham, J.H., *et al.* (2013)  
409 Comparative genomic and transcriptome analyses of pathotypes of *Xanthomonas*  
410 *citri* subsp. *citri* provide insights into mechanisms of bacterial virulence and host  
411 range. *BMC Genomics* **14**: 551.
- 412 Jiang, X.M., Neal, B., Santiago, F., Lee, S.J., Romana, L.K., and Reeves, P.R. (1991)  
413 Structure and sequence of the *rfb* (O antigen) gene cluster of *Salmonella* serovar  
414 typhimurium (strain LT2). *Mol Microbiol* **5**: 695-713.
- 415 Kim, S., Cho, Y.J., Song, E.S., Lee, S.H., Kim, J.G., and Kang, L.W. (2016) Time-resolved  
416 pathogenic gene expression analysis of the plant pathogen *Xanthomonas oryzae* pv.  
417 *oryzae*. *BMC Genomics* **17**: 345.

- 418 Köplin, R., Arnold, W., Hötte, B., Simon, R., Wang, G., and Pühler, A. (1992) Genetics of  
419 xanthan production in *Xanthomonas campestris*: the *xanA* and *xanB* genes are  
420 involved in UDP-glucose and GDP-mannose biosynthesis. *J Bacteriol* **174**: 191-199.
- 421 Krause, S.M., Johnson, T., Samadhi Karunaratne, Y., Fu, Y., Beck, D.A., Chistoserdova, L.,  
422 and Lidstrom, M.E. (2017) Lanthanide-dependent cross-feeding of methane-derived  
423 carbon is linked by microbial community interactions. *Proc Natl Acad Sci U S A* **114**:  
424 358-363.
- 425 Krogh, A., Larsson, B., von Heijne, G., and Sonnhammer, E.L. (2001) Predicting  
426 transmembrane protein topology with a hidden Markov model: application to  
427 complete genomes. *J Mol Biol* **305**: 567-580.
- 428 Kumar, S., Stecher, G., and Tamura, K. (2016) MEGA7: Molecular Evolutionary Genetics  
429 Analysis version 7.0 for bigger datasets. *Mol Biol Evol* **33**: 1870-1874.
- 430 Letunic, I., and Bork, P. (2018) 20 years of the SMART protein domain annotation  
431 resource. *Nucleic Acids Res* **46**: D493-D496.
- 432 Li, S., Jochum, C.C., Yu, F., Zaleta-Rivera, K., Du, L., Harris, S.D., and Yuen, G.Y. (2008) An  
433 antibiotic complex from *Lysobacter enzymogenes* strain C3: antimicrobial activity and  
434 role in plant disease control. *Phytopathology* **98**: 695-701.
- 435 Ma, L., Wang, J., Wang, S., Anderson, E.M., Lam, J.S., Parsek, M.R., and Wozniak, D.J.  
436 (2012) Synthesis of multiple *Pseudomonas aeruginosa* biofilm matrix  
437 exopolysaccharides is post-transcriptionally regulated. *Environ Microbiol* **14**: 1995-  
438 2005.
- 439 McKay, G.A., Woods, D.E., MacDonald, K.L., and Poole, K. (2003) Role of  
440 phosphoglucomutase of *Stenotrophomonas maltophilia* in lipopolysaccharide  
441 biosynthesis, virulence, and antibiotic resistance. *Infect Immun* **71**: 3068-3075.
- 442 Mehra-Chaudhary, R., Mick, J., and Beamer, L.J. (2011a) Crystal structure of *Bacillus*  
443 *anthracis* phosphoglucosamine mutase, an enzyme in the peptidoglycan biosynthetic  
444 pathway. *J Bacteriol* **193**: 4081-4087.
- 445 Mehra-Chaudhary, R., Mick, J., Tanner, J.J., and Beamer, L.J. (2011b) Quaternary  
446 structure, conformational variability and global motions of phosphoglucosamine  
447 mutase. *FEBS J* **278**: 3298-3307.
- 448 Mitchell, A.L., Attwood, T.K., Babbitt, P.C., Blum, M., Bork, P., Bridge, A., *et al.* (2019)  
449 InterPro in 2019: improving coverage, classification and access to protein sequence  
450 annotations. *Nucleic Acids Res* **47**: D351-D360.
- 451 Olvera, C., Goldberg, J.B., Sanchez, R., and Soberon-Chavez, G. (1999) The *Pseudomonas*  
452 *aeruginosa algC* gene product participates in rhamnolipid biosynthesis. *FEMS*  
453 *Microbiol Lett* **179**: 85-90.
- 454 Omelchenko, M.V., Galperin, M.Y., Wolf, Y.I., and Koonin, E.V. (2010) Non-homologous  
455 isofunctional enzymes: a systematic analysis of alternative solutions in enzyme  
456 evolution. *Biol Direct* **5**: 31.



- 457 Ortega, A., Zhulin, I.B., and Krell, T. (2017) Sensory repertoire of bacterial  
458 chemoreceptors. *Microbiol Mol Biol Rev* **81**: e00033-17.
- 459 Overbeek, R., Olson, R., Pusch, G.D., Olsen, G.J., Davis, J.J., Disz, T., *et al.* (2014) The SEED  
460 and the Rapid Annotation of microbial genomes using Subsystems Technology  
461 (RAST). *Nucleic Acids Res* **42**: D206-D214.
- 462 Parker, J.K., Chen, H., McCarty, S.E., Liu, L.Y., and De La Fuente, L. (2016) Calcium  
463 transcriptionally regulates the biofilm machinery of *Xylella fastidiosa* to promote  
464 continued biofilm development in batch cultures. *Environ Microbiol* **18**: 1620-1634.
- 465 Patel, N.B., Hillman, B.I., and Kobayashi, D.Y. (2010) Characterization of type IV pilus in  
466 the bacterial biocontrol agent *Lysobacter enzymogenes* strain C3. *Phytopathology*  
467 **100**: S98.
- 468 Patel, N., Cornejo, M., Lambert, D., Craig, A., Hillman, B.I., and Kobayashi, D.Y. (2011) A  
469 multifunctional role for the type IV pilus in the bacterial biological control agent  
470 *Lysobacter enzymogenes*. *Phytopathology* **101**: S138.
- 471 Pineda-Molina, E., Reyes-Darias, J.A., Lacal, J., Ramos, J.L., Garcia-Ruiz, J.M., Gavira, J.A.,  
472 and Krell, T. (2012) Evidence for chemoreceptors with bimodular ligand-binding  
473 regions harboring two signal-binding sites. *Proc Natl Acad Sci U S A* **109**: 18926-  
474 18931.
- 475 Potter, S.C., Luciani, A., Eddy, S.R., Park, Y., Lopez, R., and Finn, R.D. (2018) HMMER web  
476 server: 2018 update. *Nucleic Acids Res* **46**: W200-W204.
- 477 Qian, G., Xu, F., Venturi, V., Du, L., and Liu, F. (2014) Roles of a solo LuxR in the biological  
478 control agent *Lysobacter enzymogenes* strain OH11. *Phytopathology* **104**: 224-231.
- 479 Qian, G., Wang, Y., Qian, D., Fan, J., Hu, B., and Liu, F. (2012) Selection of available suicide  
480 vectors for gene mutagenesis using *chiA* (a chitinase encoding gene) as a new  
481 reporter and primary functional analysis of *chiA* in *Lysobacter enzymogenes* strain  
482 OH11. *World J Microbiol Biotechnol* **28**: 549-557.
- 483 Qian, G.L., Hu, B.S., Jiang, Y.H., and Liu, F.Q. (2009) Identification and characterization of  
484 *Lysobacter enzymogenes* as a biological control agent against some fungal  
485 pathogens. *Agr Sci China* **8**: 68-75.
- 486 Regni, C., Tipton, P.A., and Beamer, L.J. (2002) Crystal structure of PMM/PGM: an  
487 enzyme in the biosynthetic pathway of *P. aeruginosa* virulence factors. *Structure* **10**:  
488 269-279.
- 489 Regni, C., Naught, L., Tipton, P.A., and Beamer, L.J. (2004) Structural basis of diverse  
490 substrate recognition by the enzyme PMM/PGM from *P. aeruginosa*. *Structure* **12**:  
491 55-63.
- 492 Shackelford, G.S., Regni, C.A., and Beamer, L.J. (2004) Evolutionary trace analysis of the  
493 alpha-D-phosphohexomutase superfamily. *Protein Sci* **13**: 2130-2138.

- 494 Stevenson, G., Lee, S.J., Romana, L.K., and Reeves, P.R. (1991) The *cps* gene cluster of  
495 *Salmonella* strain LT2 includes a second mannose pathway: sequence of two genes  
496 and relationship to genes in the *rfb* gene cluster. *Mol Gen Genet* **227**: 173-180.
- 497 Stiers, K.M., and Beamer, L.J. (2018) A hotspot for disease-associated variants of human  
498 PGM1 is associated with impaired ligand binding and loop dynamics. *Structure* **26**:  
499 1337-1345.
- 500 Stiers, K.M., Muenks, A.G., and Beamer, L.J. (2017) Biology, mechanism, and structure of  
501 enzymes in the alpha-D-phosphohexomutase superfamily. *Adv Protein Chem Struct*  
502 *Biol* **109**: 265-304.
- 503 Tavares, I.M., Jolly, L., Pompeo, F., Leitao, J.H., Fialho, A.M., Sa-Correia, I., and Mengin-  
504 Lecreulx, D. (2000) Identification of the *Pseudomonas aeruginosa glmM* gene,  
505 encoding phosphoglucosamine mutase. *J Bacteriol* **182**: 4453-4457.
- 506 Upadhyay, A.A., Fleetwood, A.D., Adebali, O., Finn, R.D., and Zhulin, I.B. (2016) Cache  
507 domains that are homologous to, but different from PAS domains comprise the  
508 largest superfamily of extracellular sensors in prokaryotes. *PLoS Comput Biol* **12**:  
509 e1004862.
- 510 Wang, F.F., Cheng, S.T., Wu, Y., Ren, B.Z., and Qian, W. (2017) A bacterial receptor PcrK  
511 senses the plant hormone cytokinin to promote adaptation to oxidative stress. *Cell*  
512 *Rep* **21**: 2940-2951.
- 513 Wang, Y., Zhao, Y., Zhang, J., Shen, Y., Su, Z., Xu, G., *et al.* (2014) Transcriptomic analysis  
514 reveals new regulatory roles of Clp signaling in secondary metabolite biosynthesis  
515 and surface motility in *Lysobacter enzymogenes* OH11. *Appl Microbiol Biotechnol* **98**:  
516 9009-9020.
- 517 Whitehouse, D.B., Tomkins, J., Lovegrove, J.U., Hopkinson, D.A., and McMillan, W.O.  
518 (1998) A phylogenetic approach to the identification of phosphoglucomutase genes.  
519 *Mol Biol Evol* **15**: 456-462.
- 520 Yu, F., Zaleta-Rivera, K., Zhu, X., Huffman, J., Millet, J.C., Harris, S.D., *et al.* (2007)  
521 Structure and biosynthesis of heat-stable antifungal factor (HSAF), a broad-spectrum  
522 antimycotic with a novel mode of action. *Antimicrob Agents Chemother* **51**: 64-72.
- 523 Zhang, C., Allen, K.N., and Dunaway-Mariano, D. (2018) Mechanism of substrate  
524 recognition and catalysis of the haloalkanoic acid dehalogenase family member  $\alpha$ -  
525 phosphoglucomutase. *Biochemistry* **57**: 4504-4517.
- 526 Zhang, Z., and Yuen, G.Y. (1999) Biological control of *Bipolaris sorokiniana* on tall fescue  
527 by *Stenotrophomonas maltophilia* strain C3. *Phytopathology* **89**: 817-822.
- 528 Zhang, Z., and Yuen, G.Y. (2000) The role of chitinase production by *Stenotrophomonas*  
529 *maltophilia* strain C3 in biological control of *Bipolaris sorokiniana*. *Phytopathology*  
530 **90**: 384-389.
- 531 Zhang, Z., and Hendrickson, W.A. (2010) Structural characterization of the predominant  
532 family of histidine kinase sensor domains. *J Mol Biol* **400**: 335-353.

- 533 Zhang, Z., Schwartz, S., Wagner, L., and Miller, W. (2000) A greedy algorithm for aligning  
534 DNA sequences. *J Comput Biol* **7**: 203-214.
- 535 Zhou, Y.F., Nan, B., Nan, J., Ma, Q., Panjikar, S., Liang, Y.H., *et al.* (2008) C4-dicarboxylates  
536 sensing mechanism revealed by the crystal structures of DctB sensor domain. *J Mol*  
537 *Biol* **383**: 49-61.
- 538 Zielinski, N.A., Chakrabarty, A.M., and Berry, A. (1991) Characterization and regulation of  
539 the *Pseudomonas aeruginosa algC* gene encoding phosphomannomutase. *J Biol*  
540 *Chem* **266**: 9754-9763.
- 541 Zielinski, N.A., Maharaj, R., Roychoudhury, S., Danganan, C.E., Hendrickson, W., and  
542 Chakrabarty, A.M. (1992) Alginate synthesis in *Pseudomonas aeruginosa*:  
543 environmental regulation of the *algC* promoter. *J Bacteriol* **174**: 7680-7688.
- 544 Zimmermann, L., Stephens, A., Nam, S.Z., Rau, D., Kubler, J., Lozajic, M., *et al.* (2018) A  
545 completely reimplemented MPI Bioinformatics Toolkit with a new HHpred server at  
546 its core. *J Mol Biol* **430**: 2237-2243.
- 547

548 **Table 1. Two types of phosphomannomutase in gammaproteobacteria**

| Organism                                                            | Locus tag (GenBank accession number) |                                               |
|---------------------------------------------------------------------|--------------------------------------|-----------------------------------------------|
|                                                                     | Short PMM (XanA/ManB)                | Long PMM (AlgC)                               |
| <b>Xanthomonadales</b>                                              |                                      |                                               |
| <i>Lysobacter enzymogenes</i> C3                                    | –*                                   | GLE_0254 (ALN55613)                           |
| <i>Stenotrophomonas maltophilia</i> K279a                           | Smlt0653 (CAQ44236)                  | Smlt0403 (CAQ44002)                           |
| <i>Xanthomonas campestris</i> pv. <i>campestris</i> str. ATCC 33913 | XCC0626 (AAM39942, P0C7J2)           | XCC3857* (AAM43088*, Q8P459*) <sup>a</sup>    |
| <i>Xanthomonas citri</i> str. 306                                   | XAC3579 (AAM38422, Q8PGN7)           | XAC3912* (AAM38749*, Q8PFR6*) <sup>b</sup>    |
| <i>Xanthomonas citri</i> Aw12879                                    | XCAW_04279 (AGI10044)                | XCAW_00367 (AGI06191)                         |
| <i>Xanthomonas axonopodis</i> Xac29-1                               | XAC29_18220 (AGH79049)               | XAC29_19845 (AGH79364)                        |
| <i>Xanthomonas oryzae</i> PXO99A                                    | PXO_03174 (ACD61040)                 | PXO_02922 (ACD61293)                          |
| <i>Xylella fastidiosa</i> 9a5c                                      | XF_0260 (AAF83073)                   | XF_0151* (AAF82964*) <sup>c</sup>             |
| <b>Pseudomonadales</b>                                              |                                      |                                               |
| <i>Pseudomonas aeruginosa</i> PAO1                                  | –                                    | PA5322* (AAG08707*, P26276*) <sup>d</sup>     |
| <i>Pseudomonas aeruginosa</i> UCBPP-PA14                            | –                                    | PA14_70270 (ABJ14705, Q02E40*) <sup>e</sup>   |
| <i>Pseudomonas aeruginosa</i> M1608                                 | –                                    | HW04_21660 (ALY73569)                         |
| <i>Pseudomonas fluorescens</i> SBW25                                | PFLU_5986 (CAY53511)                 | –                                             |
| <i>Pseudomonas mendocina</i> ymp                                    | –                                    | Pmen_4379 (ABP87126)                          |
| <i>Pseudomonas protegens</i> Pf-5                                   | PFL_6054 (AAY95242)                  | –                                             |
| <i>Pseudomonas putida</i> F1                                        | Pput_5197 (ABQ81315)                 | –                                             |
| <i>Pseudomonas stutzeri</i> A1501                                   | –                                    | PST_0470 (ABP78176)                           |
| <i>Pseudomonas syringae</i> pv. <i>tomato</i> DC3000                | –                                    | PSPTO_0083* (AAO53637*, Q88BD4*) <sup>f</sup> |
| <b>Alteromonadales</b>                                              |                                      |                                               |
| <i>Marinobacter</i> sp. CP1                                         | ACP86_12145 (AKV96849)               | ACP86_07110 (AKV95939)                        |
| <b>Cellvibrionales</b>                                              |                                      |                                               |
| <i>Cellvibrio japonicus</i> Ueda107                                 | CJA_2117 (ACE83813)                  | CJA_3524 (ACE86337)                           |
| <i>Kangiella koreensis</i> DSM 16069                                | –                                    | Kkor_2220 (ACV27629)                          |
| <b>Chromatiales</b>                                                 |                                      |                                               |
| <i>Nitrococcus mobilis</i> Nb-231                                   | NB231_04975 (EAR22234)               | NB231_11214 (EAR20842)                        |
| <i>Nitrosococcus halophilus</i> Nc 4                                | –                                    | Nhal_3802 (ADE16817)                          |
| <b>Methylococcales</b>                                              |                                      |                                               |
| <i>Methylococcus capsulatus</i> Bath                                | –                                    | MCA2782* (AAU91112*) <sup>g</sup>             |
| <i>Methylomonas methanica</i> MC09                                  | Metme_3866 (AEG02220)                | Metme_3325 (AEG01696)                         |
| <b>Oceanospirillales</b>                                            |                                      |                                               |
| <i>Alcanivorax borkumensis</i> SK2                                  | ABO_0937 (CAL16385)                  | ABO_0211 (CAL15659)                           |
| <b>Thiotrichales</b>                                                |                                      |                                               |
| <i>Cycloclasticus</i> sp. PY97N                                     | –                                    | CPC19_03270 (ATI02519)                        |
| <i>Cycloclasticus zancles</i> 78-ME                                 | CYCME_0971 (AGS39304)                | CYCME_0529 (AGS38870)                         |

549

550 \* A dash indicates the absence of the gene in the respective genome. All GenBank entries in  
551 this table represent version 1 of the respective accession number. For several model  
552 organisms, UniProt accessions are listed as well. Asterisks indicate long (>700 aa) PMM  
553 sequences that are listed in GenBank and/or UniProt databases in an N-terminally truncated  
554 form. An expanded version of this table with appropriate hyperlinks is available as  
555 Supporting Information [Table S3](#).

556 <sup>a</sup> - Corrected 782-aa sequence of XCC3857 has been submitted to RefSeq.  
557 <sup>b</sup> - The full length 781-aa sequence of XAC3912 is available as RefSeq entry [WP\\_015471480](#).  
558 <sup>c</sup> - The full length 787-aa sequence of XF\_0151 is available as RefSeq entry [WP\\_023906061](#).  
559 <sup>d</sup> - UniProt entry [P26276](#) lacks 405 N-terminal amino acid residues, the full length 868-aa ORF is  
560 available as RefSeq entry [NP\\_254009.2](#).  
561 <sup>e</sup> - UniProt entry [Q02E40](#) lacks 391 N-terminal amino acid residues, removed as 'erroneous  
562 initiation'. ABJ14705 is the full-length entry.  
563 <sup>f</sup> - UniProt entry [Q88BD4](#) lacks 359 N-terminal amino acid residues; the full length 824-aa ORF is  
564 equivalent to residues 38-861 of GenBank entry [KPY97009](#).  
565 <sup>g</sup> - The sequence of MCA2782 is at least 787 aa long.  
566

567 **FIGURE LEGEND**

568 **Figure 1. Le2152 is required for twitching motility in *Lysobacter enzymogenes* OH11.**

569 Loss of *Le2152* resulted in the absence of motile cells on the margins of the mutant  
570 colonies. **A.** OH11, wild-type strain of *L. enzymogenes*. **B.**  $\Delta Le2152$ , the *Le2152* in-frame  
571 deletion mutant of OH11. **C.**  $\Delta Le2152(2152)$ ,  $\Delta Le2152$  strain complemented with  
572 plasmid-borne *Le2152* under its native promoter. **D.**  $\Delta Le2152(pBBR)$ ,  $\Delta Le2152$  strain  
573 harboring an empty vector.

574 **Figure 2. Domain organization of the *Lysobacter enzymogenes* Le2152 protein.**

575 Blue boxes indicate predicted transmembrane regions; PGM-PMM indicates the  
576 cytoplasmic phosphomannomutase domain, a combination of Pfam (El-Gebali *et al.*,  
577 2019) domains PGM\_PMM\_I ([PF02878](#)), PGM\_PMM\_II ([PF02879](#)), PGM\_PMM\_III  
578 ([PF02880](#)), and PGM\_PMM\_IV ([PF00408](#)). The transmembrane orientation and domain  
579 architecture of Le2152 were predicted using the TMHMM and SMART tools (Krogh *et*  
580 *al.*, 2001; Letunic and Bork, 2018). The predicted periplasmic domain was identified as  
581 dCache using HHpred (Zimmermann *et al.*, 2018), see Supporting Information [Figure S2](#)  
582 for details.

583 **Figure 3. Genomic neighborhoods of phosphomannomutase genes in selected**

584 **gammaproteobacteria.** Phosphomannomutase (PMM) genes are shown in red, their  
585 genomic locus tags and GenBank accession numbers are listed in [Table 1](#). Members of  
586 the conserved neighborhoods are indicated with bright colors with same colors for all  
587 homologs; variable genes are in grey, uncharacterized genes are in white. Gene names  
588 are from the COG database (Galperin *et al.*, 2015), the shapes are drawn approximately  
589 to size. **A.** Gene clusters of the *algC* (“long” PMM) genes. The coloring of *algC* reflects  
590 domain organization of its product: the periplasmic dCache domain is shown as red  
591 checkered box, two transmembrane segments as black checkered boxes, the flexible  
592 linker as red dotted box and the enzymatic domain is in red. **B.** Gene clusters of the “short”  
593 PMM genes. See text for details.

## 594 **Supporting Information**

595 Table S1. Strains and plasmids used in this study

596 Table S2. Primers used in this study

597 Table S3. Phosphomannomutases and phosphoglucosamine mutases encoded in  
598 selected gammaproteobacterial genomes

599 Table S4. Identification of two-domain phosphomannomutase transcripts in RNA-seq  
600 samples

601 Figure S1. Twitching motility of *Lysobacter enzymogenes* is not affected by the absence  
602 of the *glmM* gene.

603 Figure S2. Molecular weight and domain organization of the Le2152 protein.

604 Figure S3. Genomic neighborhoods of the *Xanthomonas* spp. and *Pseudomonas* spp.  
605 “long” PMM genes according to the SEED database.

606 Figure S4. Maximum likelihood phylogenetic tree of the cytoplasmic enzymatic domains  
607 of “long” and “short” phosphomannomutases.

608 Figure S5. RNA-Seq data for the “long” PMMs from *Lysobacter enzymogenes* and  
609 *Pseudomonas aeruginosa*.

610

611

612

613

614

615

616

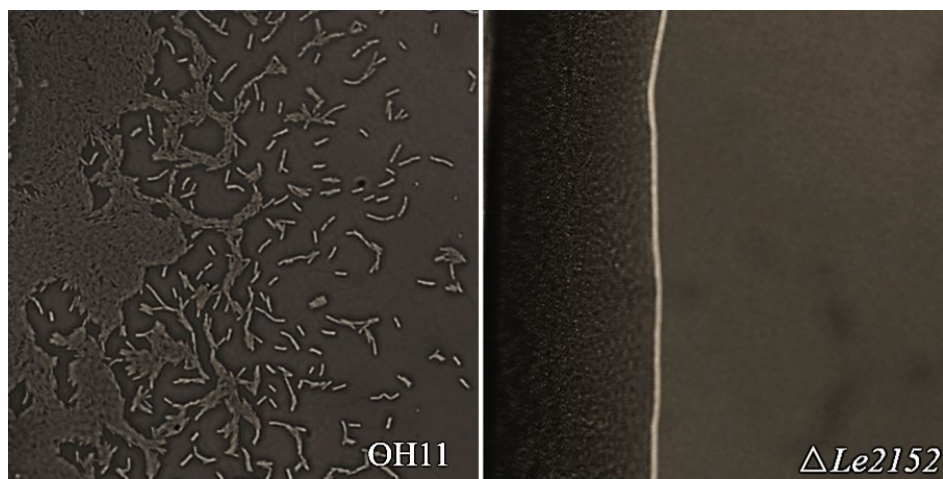

617

618

619

620

621

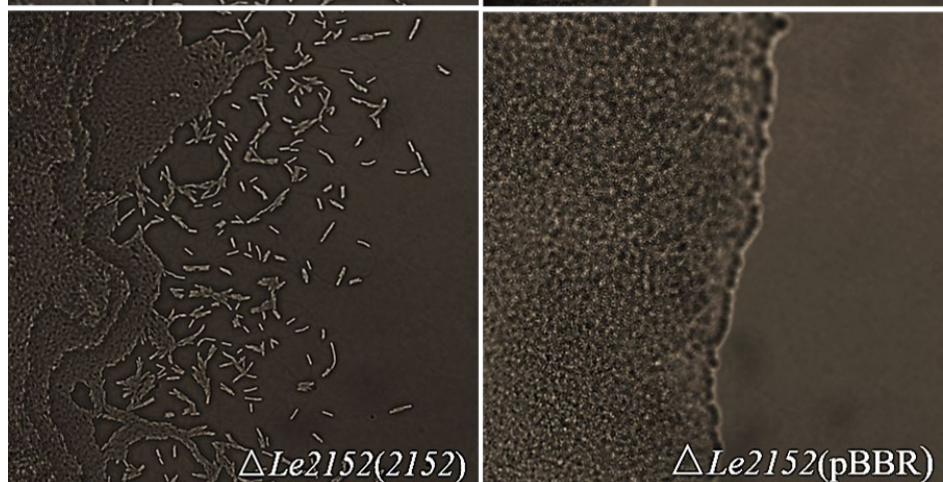

622 **Figure 1. Le2152 is required for twitching motility in *Lysobacter enzymogenes* OH11.**

623



624

625

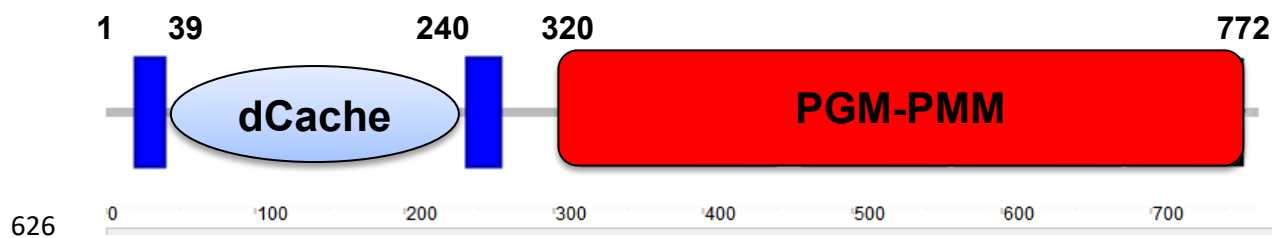

626

627 **Figure 2. Domain architecture of Le2152.**

628

629

630

631

632

633

634

635

636

637

638

639

640

641

642

643

644

645

646

647

648

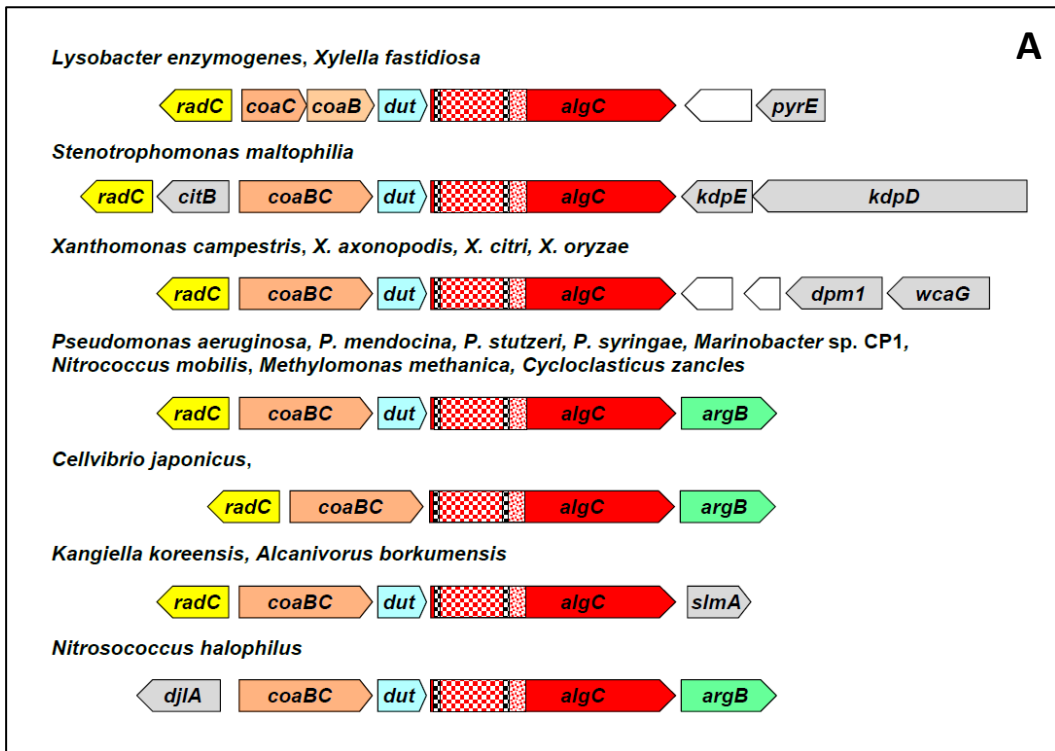

649

650

651

652

653

654

655

656

657

658

659

660

661

662

663

664

665

666

667

668

669

670

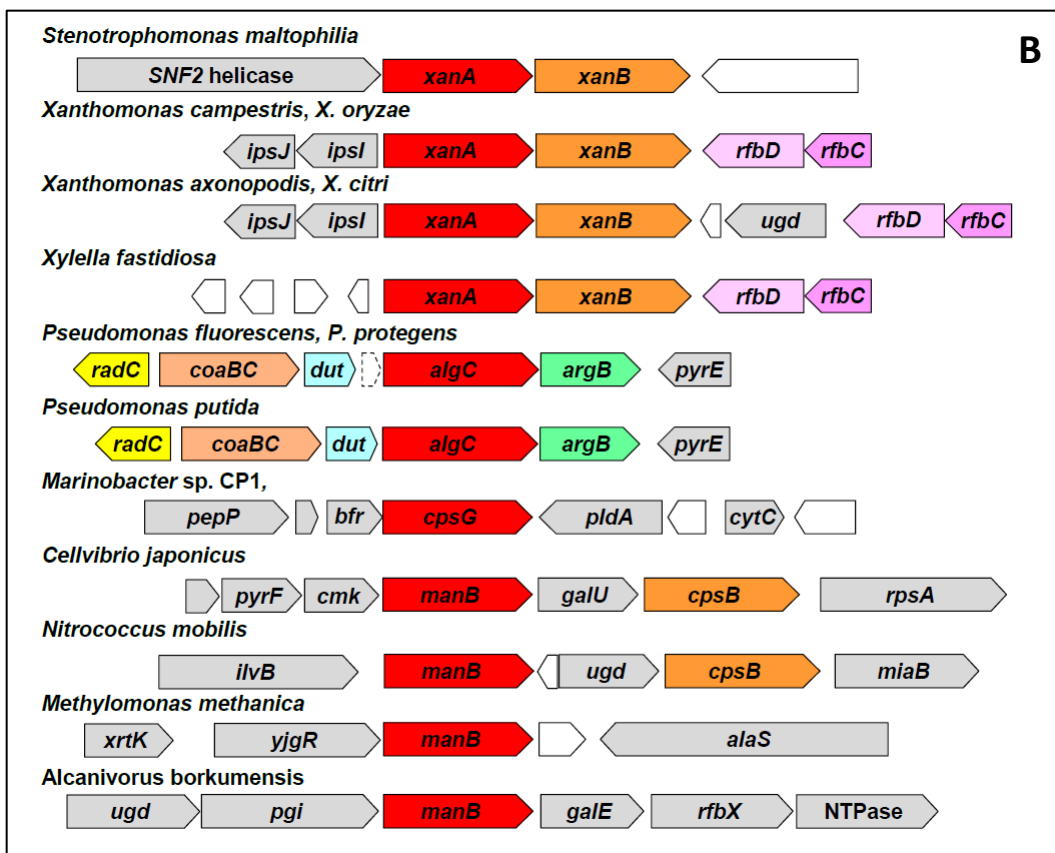

671

672

**Figure 3. Genomic neighborhoods of phosphomannomutase genes in selected gammaproteobacteria**

673
